# Supplementary material for: Fully automated and colorimetric foodborne pathogen detection on an integrated centrifugal microfluidic device
Source: Royal Society of Chemistry journal article supplement (doi:10.1039/c6lc00326e), 2016-01-01
Supplement: c6lc00326e1.pdf [file c6lc00326e1.pdf]

## Electronic Supplementary Information

# Fully automated and colorimetric foodborne pathogen detection on an integrated centrifugal microfluidic device

Seung Jun Oh, Byung Hyun Park, Goro Choi, Ji Hyun Seo, Jae Hwan Jung, Jong Seob Choi, Do Hyun Kim and Tae Seok Seo<sup>a\*</sup>

*Department of Chemical and Biomolecular Engineering, Korea Advanced Institute of Science and Technology (KAIST), 291 Daehak-ro, Yuseong-gu, Daejeon 305-701, Republic of Korea.*

**Table S1.** Primer sequence information for the multiplexed LAMP reaction

| Target gene / Accession #                                                | Primer | Sequence (5' to 3')                          | Length [bp] |
|--------------------------------------------------------------------------|--------|----------------------------------------------|-------------|
| <i>E. coli</i> O157:H7<br>fliC gene<br>(CP002967.1 :<br>2147323-2149017) | FIP    | CTACCAACCTGTCTGAAGCGCATCGACATGTTGGACACTTCG   | 42          |
|                                                                          | BIP    | GGTGACTGCGGAATCCAGACGTGAGGCAATTGCATCCATCG    | 41          |
|                                                                          | F3     | GCCTGCTGGATGATCTGC                           | 18          |
|                                                                          | B3     | CGGCTCTGCAACCAAAGA                           | 18          |
| <i>S. Typhimurium</i><br>invA gene<br>(M90846.1)                         | FIP    | TCCGCGACACGTTTCTGAACCCTCTATTGTCACCGTGGTCC    | 40          |
|                                                                          | BIP    | TGCCGATTTGAAGGCCGGTACAGTACGCTTCGCCGTTTC      | 38          |
|                                                                          | F3     | GCGGTGGGTTTTGTTGTCT                          | 19          |
|                                                                          | B3     | CGTAAAGCTGGCTTTCCCTT                         | 20          |
| <i>V. parahaemolyticus</i><br>toxR gene<br>(L11929.1)                    | FIP    | TCGACTCCACATTCACTCGATTACTGATAACTTGCCAGACG    | 41          |
|                                                                          | BIP    | CCTGCCGAATGGCGATTACAATTAATTGTCGATTGAGCCG     | 40          |
|                                                                          | F3     | CAACCATGGTGACTGTGA                           | 18          |
|                                                                          | B3     | CCAGCGACCTTTCTCTGA                           | 18          |
| <i>L. monocytogenes</i><br>iap gene<br>(JQ015300.1)                      | FIP    | ATCAAATGTAGTTGGTCCGTTACCAGCTGAAGCTCAAAAACACC | 44          |
|                                                                          | BIP    | ATGTATTTGCTAAAGCGGGAATCTGTAGTGCTAGCGTATTGTGC | 44          |
|                                                                          | F3     | AATTCAAGTGCAAGTGCTAT                         | 20          |
|                                                                          | B3     | GTTTTGCTTGAGATTCAGAGA                        | 21          |

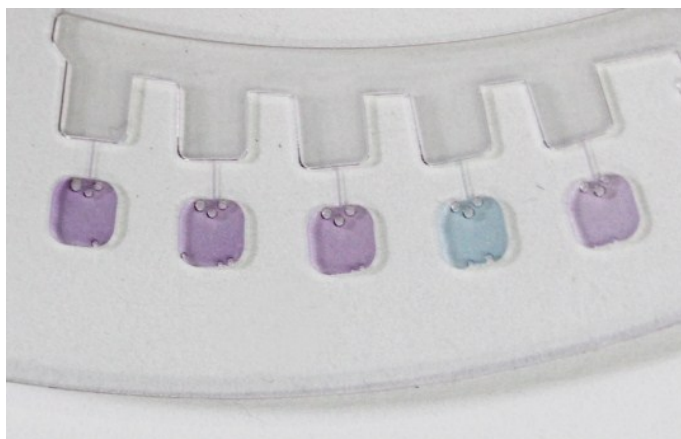

**Fig. S1.** Singleplex *Listeria monocytogenes* detection on the lab-on-a-disc. A real sample containing  $10^4$  cells of *L. monocytogenes* was used. Colour change was only observed in the reaction chamber #4, where the LAMP primer set targeting *L. monocytogenes* had been pre-stored, which confirmed specific detection of that bacteria species.

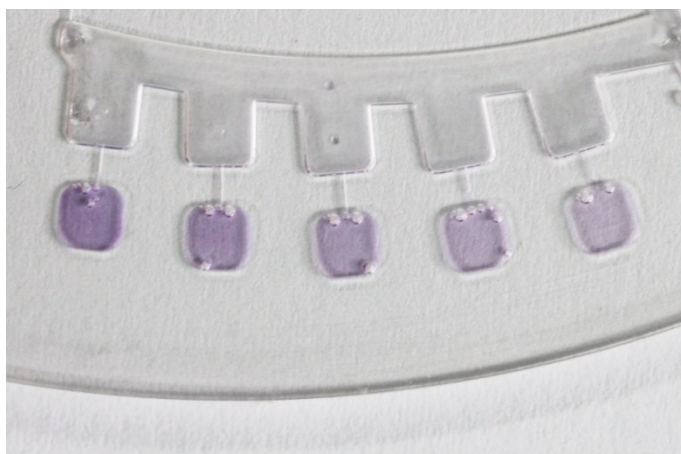

**Fig. S2.** Negative control experiments using a real sample spiked with non-pathogenic *Escherichia coli* K-12. No colour change was shown in the reaction chambers. This result proves the ability of this assay to distinguish bacteria sub-types within *E. coli* species.
